# Supplementary material
Source: PubMed Central journal article supplement (PMC3530877)
Supplement: 97320630081230S1.pdf [file 97320630081230S1.pdf]

## Supplementary material:

### Methodology:

#### Relative synonymous codon usage (RSCU)

RSCU value of each codon is the observed frequency of that codon divided by the expected frequency for synonymous codons of an amino acid using equal usage as a conjecture.

Thus,

$$RSCU_i = X_i / (1/n \sum_{i=1}^n X_i)$$

Where  $X_i$  is the occurrence of  $i^{\text{th}}$  synonymous codon of an  $n$ -fold degenerate amino acid and  $n$  may take any one of the values, 1, 2, 3, 4 and 6. RSCU value of 1 indicates even usage of codon and its value lesser than, or greater than one, indicates their uneven use.

#### Effective Number of Codons (ENC)

ENC is the most widely used estimator of codon usage bias [21] and provides the range of codon preferences in a gene. Its value lies among 20 to 61. ENC value of 61 indicates equal codon usage for coding an amino acid and, its value is 20 when only single codon codes it. It is estimated as

$$N_c = 2 + 9/F_2 + 1/F_3 + 5/F_4 + 3/F_6$$

Amino acid having multiple synonymous codons is equivalent to a locus, having that number of alleles. If synonymous codons encoding an amino acid are present in equal frequencies then it represents minimum homozygosity. Here  $F_k$  is the average homozygosity of all  $k$ -fold degenerate amino acids.

**Table 1:** Comparison of genome and CDSs characteristics in six different *Plasmodium* species

| Species             | Chromosomes | Genome size(Mb) | CDS <sup>a</sup> Count | Genomic GC% | CDS <sup>b</sup> GC% | CDS <sup>c</sup> GC1% | CDS <sup>d</sup> GC2% | eCDS GC3% | ENC <sup>f</sup> |
|---------------------|-------------|-----------------|------------------------|-------------|----------------------|-----------------------|-----------------------|-----------|------------------|
| <i>P.falciparum</i> | 14          | 23.3            | 5523                   | 19.41       | 23.78                | 31.75                 | 22.19                 | 17.4      | 37.89            |
| <i>P.vivax</i>      | 14          | 27.01           | 5435                   | 42.3        | 46.21                | 46.96                 | 35.18                 | 56.49     | 55.54            |
| <i>P.knowlesi</i>   | 14          | 23.46           | 5197                   | 37.5        | 40.19                | 42.98                 | 32.18                 | 45.39     | 55.28            |
| <i>P.yoelii</i>     | 14          | 23.12           | 7724                   | 24.69       | 24.22                | 31.9                  | 24.12                 | 16.56     | 38.16            |
| <i>P.chabaudi</i>   | 14          | 18.83           | 251                    | 24.33       | 26.42                | 34.01                 | 26.34                 | 18.91     | 39.71            |
| <i>P.berghei</i>    | 14          | 18.52           | 4904                   | 23.71       | 23.73                | 30.86                 | 23.35                 | 16.97     | 38.61            |

<sup>a</sup> Coding sequence; <sup>b</sup> Percentage of GC in CDS; <sup>c</sup> Percentage of GC at first site of codon in CDS; <sup>d</sup> Percentage of GC at second site of codon in CDS; <sup>e</sup> Percentage of GC at third site of codon in CDS; <sup>f</sup> ENC<sup>f</sup> is effective number of codons

**Table 2:** Characterization of synonymous codon usage in the coding sequences of six *Plasmodium* species

| Amino Acids | Codons | <i>P.falciparum</i> |      |      | <i>P.vivax</i> |      |      | <i>P.knowlesi</i> |      |      |
|-------------|--------|---------------------|------|------|----------------|------|------|-------------------|------|------|
|             |        | Codon count         | RSCU | tRNA | Codon count    | RSCU | tRNA | Codon count       | RSCU | tRNA |
| Ala         | GCA    | 34793               | 1.7  | 1    | 50681          | 1.03 | 1    | 48553             | 1.39 | 1    |
|             | GCC    | 8765                | 0.43 | 0    | 60369          | 1.22 | 0    | 33951             | 0.97 | 0    |
|             | GCG    | 4490                | 0.22 | 1    | 54869          | 1.11 | 1    | 26736             | 0.77 | 1    |
|             | GCT    | 33929               | 1.66 | 1    | 31847          | 0.64 | 1    | 30398             | 0.87 | 1    |
| Arg         | AGA    | 66359               | 3.62 | 1    | 46194          | 1.5  | 1    | 55508             | 2.05 | 1    |
|             | AGG    | 18131               | 0.99 | 1    | 65474          | 2.12 | 1    | 51534             | 1.9  | 1    |
|             | CGA    | 10074               | 0.55 | 1    | 17759          | 0.58 | 1    | 17631             | 0.65 | 1    |
|             | CGC    | 1786                | 0.1  | 0    | 23601          | 0.77 | 0    | 13147             | 0.49 | 0    |
|             | CGG    | 1184                | 0.06 | 0    | 21295          | 0.69 | 0    | 11553             | 0.43 | 0    |
| Asn         | CGT    | 12491               | 0.68 | 1    | 10612          | 0.34 | 1    | 13282             | 0.49 | 1    |
|             | AAC    | 83114               | 0.28 | 1    | 144197         | 1.06 | 1    | 129407            | 0.87 | 1    |
| Asp         | AAT    | 512727              | 1.72 | 0    | 128740         | 0.94 | 0    | 169295            | 1.13 | 0    |
|             | GAC    | 36349               | 0.27 | 1    | 109940         | 1.07 | 0    | 84445             | 0.81 | 1    |
| Cys         | GAT    | 231759              | 1.73 | 0    | 96160          | 0.93 | 0    | 123089            | 1.19 | 0    |
|             | TGC    | 9692                | 0.26 | 1    | 45211          | 1.3  | 1    | 33619             | 0.96 | 1    |
| Gln         | TGT    | 63879               | 1.74 | 1    | 24272          | 0.7  | 0    | 36445             | 1.04 | 0    |
|             | CAA    | 99479               | 1.73 | 1    | 55907          | 0.91 | 0    | 63750             | 1.1  | 1    |
| Glu         | CAG    | 15366               | 0.27 | 1    | 67594          | 1.09 | 1    | 52433             | 0.9  | 1    |
|             | GAA    | 253145              | 1.71 | 11   | 152141         | 1.05 | 1    | 175380            | 1.26 | 1    |
| Gly         | GAG    | 42934               | 0.29 | 1    | 137884         | 0.95 | 1    | 102750            | 0.74 | 1    |
|             | GGA    | 51636               | 1.76 | 1    | 63440          | 1.02 | 1    | 75242             | 1.49 | 1    |
|             | GGC    | 5576                | 0.19 | 1    | 62213          | 1    | 1    | 31260             | 0.62 | 1    |
|             | GGG    | 11543               | 0.39 | 0    | 83649          | 1.35 | 0    | 49851             | 0.98 | 0    |
|             | GGT    | 48919               | 1.66 | 0    | 38612          | 0.62 | 0    | 46208             | 0.91 | 0    |
| His         | CAC    | 14471               | 0.29 | 1    | 63638          | 1.24 | 1    | 44525             | 0.95 | 1    |
|             | CAT    | 85842               | 1.71 | 0    | 38668          | 0.76 | 0    | 49048             | 1.05 | 0    |

|     |     |        |      |   |        |      |   |        |      |   |
|-----|-----|--------|------|---|--------|------|---|--------|------|---|
| Ile | ATA | 209126 | 1.63 | 1 | 65047  | 0.92 | 1 | 83324  | 1.07 | 1 |
|     | ATC | 26171  | 0.2  | 0 | 66006  | 0.93 | 0 | 55344  | 0.71 | 0 |
|     | ATT | 150010 | 1.17 | 2 | 80780  | 1.14 | 1 | 93999  | 1.21 | 1 |
| Leu | CTA | 25204  | 0.48 | 1 | 36455  | 0.71 | 1 | 38515  | 1    | 0 |
|     | CTC | 7516   | 0.14 | 0 | 57220  | 1.11 | 0 | 39138  | 1.02 | 0 |
|     | CTG | 6245   | 0.12 | 1 | 76151  | 1.48 | 1 | 46647  | 1.21 | 1 |
|     | CTT | 36391  | 0.69 | 1 | 29225  | 0.57 | 0 | 37960  | 0.99 | 1 |
|     | TTA | 196854 | 3.74 | 1 | 47446  | 0.92 | 1 | 1592   | 0.04 | 1 |
|     | TTG | 44005  | 0.84 | 1 | 63264  | 1.23 | 1 | 66832  | 1.74 | 1 |
|     | AAA | 397696 | 1.63 | 6 | 177216 | 1.04 | 1 | 197893 | 1.14 | 1 |
| Lys | AAG | 89601  | 0.37 | 1 | 163068 | 0.96 | 1 | 149760 | 0.86 | 1 |
|     | AAC | 29733  | 0.33 | 2 | 74227  | 0.92 | 1 | 65341  | 0.84 | 1 |
| Phe | TTC | 151980 | 1.67 | 0 | 86793  | 1.08 | 0 | 91095  | 1.16 | 0 |
|     | TTT | 37574  | 1.82 | 1 | 34012  | 1    | 1 | 36283  | 1.32 | 1 |
| Pro | CCA | 8603   | 0.42 | 1 | 56071  | 1.65 | 0 | 32679  | 1.19 | 0 |
|     | CCC | 3955   | 0.19 | 1 | 24870  | 0.73 | 0 | 14802  | 0.54 | 1 |
|     | CCG | 32522  | 1.57 | 1 | 20822  | 0.61 | 0 | 25939  | 0.95 | 0 |
|     | CCT | 16272  | 0.37 | 1 | 96379  | 1.9  | 0 | 57647  | 1.23 | 1 |
| Ser | AGC | 84758  | 1.92 | 0 | 56349  | 1.11 | 0 | 66663  | 1.42 | 0 |
|     | AGT | 68951  | 1.56 | 2 | 27116  | 0.53 | 1 | 35969  | 0.77 | 1 |
|     | TCA | 21347  | 0.48 | 0 | 59906  | 1.18 | 0 | 53484  | 1.14 | 0 |
|     | TCC | 12549  | 0.28 | 1 | 35543  | 0.7  | 2 | 28247  | 0.6  | 1 |
|     | TCT | 61057  | 1.38 | 1 | 28859  | 0.57 | 1 | 38920  | 0.83 | 1 |
| Thr | ACA | 90367  | 2.12 | 3 | 34672  | 0.85 | 0 | 53934  | 1.28 | 1 |
|     | ACC | 19983  | 0.47 | 1 | 54590  | 1.35 | 0 | 43979  | 1.04 | 0 |
|     | ACG | 15715  | 0.37 | 1 | 48455  | 1.19 | 1 | 38397  | 0.91 | 1 |
|     | ACT | 44087  | 1.04 | 1 | 24603  | 0.61 | 1 | 32898  | 0.78 | 1 |
| Tyr | TAC | 26009  | 0.22 | 1 | 94635  | 1.25 | 1 | 80054  | 1.06 | 0 |
|     | TAT | 211010 | 1.78 | 1 | 57169  | 0.75 | 0 | 71550  | 0.94 | 0 |
| Val | GTA | 65044  | 1.64 | 2 | 35989  | 0.73 | 0 | 47021  | 1.01 | 1 |
|     | GTC | 10114  | 0.26 | 2 | 39013  | 0.79 | 0 | 29212  | 0.63 | 0 |
|     | GTG | 19968  | 0.5  | 1 | 81891  | 1.66 | 1 | 61303  | 1.32 | 1 |
|     | GTT | 63088  | 1.6  | 1 | 40584  | 0.82 | 0 | 47923  | 1.03 | 1 |
| Met | ATG | 91194  | 1    | 3 | 76190  | 1    | 1 | 83822  | 1    | 2 |
|     | TGG | 20693  | 1    | 1 | 23413  | 1    | 1 | 24229  | 1    | 1 |

| Amino Acids | Codons | Codon count | <i>P.yoelii</i> |      |             | <i>P.chabaudi</i> |      |             | <i>P.berghei</i> |      |  |
|-------------|--------|-------------|-----------------|------|-------------|-------------------|------|-------------|------------------|------|--|
|             |        |             | RSCU            | tRNA | Codon count | RSCU              | tRNA | Codon count | RSCU             | tRNA |  |
| Ala         | GCA    | 38797       | 1.94            | 1    | 2094        | 1.85              | 1    | 36711       | 1.93             | 1    |  |
|             | GCC    | 7520        | 0.38            | 0    | 517         | 0.46              | 0    | 7287        | 0.38             | 0    |  |
|             | GCG    | 3942        | 0.2             | 1    | 266         | 0.23              | 1    | 4124        | 0.22             | 1    |  |
|             | GCT    | 29848       | 1.49            | 0    | 1662        | 1.46              | 1    | 27776       | 1.46             | 1    |  |
| Arg         | AGA    | 50385       | 3.55            | 1    | 2336        | 3.38              | 1    | 50086       | 3.47             | 1    |  |
|             | AGG    | 9787        | 0.69            | 1    | 516         | 0.75              | 1    | 11349       | 0.79             | 1    |  |
|             | CGA    | 13429       | 0.95            | 1    | 722         | 1.05              | 1    | 14219       | 0.99             | 1    |  |
|             | CGC    | 1801        | 0.13            | 0    | 86          | 0.12              | 0    | 1944        | 0.13             | 0    |  |
|             | CGG    | 1956        | 0.14            | 0    | 95          | 0.14              | 0    | 1867        | 0.13             | 0    |  |
|             | CGT    | 7804        | 0.55            | 1    | 389         | 0.56              | 1    | 7043        | 0.49             | 1    |  |
|             | AAC    | 67544       | 0.31            | 2    | 3238        | 0.35              | 2    | 72949       | 0.33             | 2    |  |
| Asn         | AAT    | 366255      | 1.69            | 0    | 15433       | 1.65              | 0    | 375658      | 1.67             | 0    |  |
|             | AAC    | 29987       | 0.3             | 1    | 1738        | 0.37              | 2    | 30829       | 0.33             | 2    |  |
| Asp         | GAT    | 168558      | 1.7             | 0    | 7651        | 1.63              | 0    | 158791      | 1.67             | 0    |  |
|             | GAC    | 12303       | 0.42            | 1    | 676         | 0.49              | 1    | 15102       | 0.52             | 1    |  |
| Cys         | TGC    | 46259       | 1.58            | 0    | 2094        | 1.51              | 0    | 42597       | 1.48             | 0    |  |
|             | TGT    | 82349       | 1.77            | 1    | 4176        | 1.73              | 1    | 81299       | 1.76             | 1    |  |
| Gln         | CAA    | 10489       | 0.23            | 1    | 649         | 0.27              | 1    | 10913       | 0.24             | 1    |  |
|             | CAG    | 209247      | 1.75            | 0    | 9331        | 1.69              | 2    | 209975      | 1.76             | 2    |  |
| Glu         | GAA    | 29302       | 0.25            | 1    | 1696        | 0.31              | 1    | 29097       | 0.24             | 1    |  |
|             | GAG    | 52641       | 1.92            | 1    | 2805        | 1.9               | 1    | 49605       | 1.95             | 1    |  |
| Gly         | GGA    | 8690        | 0.32            | 1    | 571         | 0.39              | 1    | 8422        | 0.33             | 1    |  |
|             | GGC    | 13505       | 0.49            | 0    | 735         | 0.5               | 0    | 14675       | 0.58             | 0    |  |
|             | GGG    | 34755       | 1.27            | 0    | 1789        | 1.21              | 0    | 29052       | 1.14             | 0    |  |
|             | GGT    | 10914       | 0.34            | 1    | 597         | 0.38              | 1    | 11438       | 0.35             | 1    |  |
| His         | CAC    | 52962       | 1.66            | 0    | 2549        | 1.62              | 0    | 54047       | 1.65             | 0    |  |
|             | CAT    | 167453      | 1.54            | 1    | 7381        | 1.54              | 1    | 179731      | 1.56             | 1    |  |
| Ile         | ATA    | 22147       | 0.2             | 2    | 1135        | 0.24              | 0    | 22567       | 0.2              | 0    |  |
|             | ATC    | 135952      | 1.25            | 1    | 5886        | 1.23              | 1    | 142256      | 1.24             | 1    |  |
|             | ATT    | 23276       | 0.53            | 1    | 1212        | 0.58              | 1    | 24206       | 0.54             | 1    |  |
| Leu         | CTA    | 5832        | 0.13            | 0    | 298         | 0.14              | 0    | 5712        | 0.13             | 0    |  |
|             | CTC    | 4518        | 0.1             | 1    | 264         | 0.13              | 1    | 4959        | 0.11             | 1    |  |
|             | CTG    | 30415       | 0.69            | 1    | 1572        | 0.76              | 1    | 30297       | 0.67             | 1    |  |
|             | CTT    |             |                 |      |             |                   |      |             |                  |      |  |

|            |     |        |      |   |       |      |   |        |      |   |
|------------|-----|--------|------|---|-------|------|---|--------|------|---|
|            | TTA | 162034 | 3.7  | 1 | 7339  | 3.53 | 1 | 164738 | 3.67 | 1 |
|            | TTG | 36870  | 0.84 | 2 | 1780  | 0.86 | 1 | 39492  | 0.88 | 1 |
| <b>Lys</b> | AAA | 340805 | 1.75 | 2 | 14725 | 1.67 | 2 | 352969 | 1.75 | 2 |
|            | AAG | 48673  | 0.25 | 1 | 2944  | 0.33 | 1 | 49891  | 0.25 | 1 |
| <b>Phe</b> | TTC | 20237  | 0.25 | 1 | 1003  | 0.28 | 2 | 20669  | 0.25 | 2 |
|            | TTT | 140626 | 1.75 | 0 | 6262  | 1.72 | 0 | 145182 | 1.75 | 0 |
| <b>Pro</b> | CCA | 38708  | 2.09 | 1 | 2287  | 2.1  | 1 | 36227  | 2.06 | 1 |
|            | CCC | 8342   | 0.45 | 0 | 557   | 0.51 | 0 | 7845   | 0.45 | 0 |
|            | CCG | 3511   | 0.19 | 1 | 217   | 0.2  | 1 | 3543   | 0.2  | 1 |
|            | CCT | 23398  | 1.27 | 0 | 1290  | 1.19 | 1 | 22888  | 1.3  | 1 |
| <b>Ser</b> | AGC | 21780  | 0.54 | 2 | 1275  | 0.64 | 2 | 22965  | 0.58 | 2 |
|            | AGT | 68288  | 1.69 | 0 | 3458  | 1.74 | 0 | 65868  | 1.66 | 0 |
|            | TCA | 66893  | 1.66 | 1 | 3357  | 1.69 | 1 | 66547  | 1.68 | 1 |
|            | TCC | 13641  | 0.34 | 0 | 798   | 0.4  | 0 | 15010  | 0.38 | 0 |
|            | TCG | 13718  | 0.34 | 1 | 711   | 0.36 | 1 | 13543  | 0.34 | 1 |
|            | TCT | 57621  | 1.43 | 0 | 2340  | 1.18 | 1 | 54037  | 1.36 | 1 |
| <b>Thr</b> | ACA | 75610  | 2.1  | 3 | 3733  | 2.09 | 1 | 75399  | 2.12 | 1 |
|            | ACC | 14101  | 0.39 | 0 | 757   | 0.42 | 0 | 12922  | 0.36 | 0 |
|            | ACG | 9230   | 0.26 | 0 | 526   | 0.29 | 1 | 9233   | 0.26 | 1 |
|            | ACT | 44993  | 1.25 | 1 | 2137  | 1.2  | 1 | 44464  | 1.25 | 1 |
| <b>Tyr</b> | TAC | 21541  | 0.24 | 0 | 1166  | 0.28 | 2 | 24271  | 0.26 | 2 |
|            | TAT | 159855 | 1.76 | 0 | 7266  | 1.72 | 0 | 164340 | 1.74 | 0 |
| <b>Val</b> | GTA | 47397  | 1.54 | 2 | 2278  | 1.5  | 1 | 45801  | 1.53 | 1 |
|            | GTC | 7884   | 0.26 | 0 | 437   | 0.29 | 0 | 7768   | 0.26 | 0 |
|            | GTG | 12946  | 0.42 | 1 | 652   | 0.43 | 1 | 12518  | 0.42 | 1 |
|            | GTT | 54898  | 1.78 | 1 | 2688  | 1.78 | 1 | 53449  | 1.79 | 1 |
| <b>Met</b> | ATG | 64260  | 1    | 3 | 3152  | 1    | 3 | 63868  | 1    | 3 |
| <b>Trp</b> | TGG | 17135  | 1    | 1 | 873   | 1    | 1 | 16847  | 1    | 1 |
